# Supplementary material for: A new fluorescent chemosensor for highly selective and sensitive detection of inorganic phosphate (Pi) in aqueous solution and living cells
Source: Royal Society of Chemistry journal article supplement (doi:10.1039/c5ra08712k), 2015-01-01
Supplement: c5ra08712k1.pdf [file c5ra08712k1.pdf]

## **A New Fluorescent Chemosensor for Highly Selective and Sensitive Detection of Inorganic Phosphate (Pi) in Aqueous Solution and Living Cells**

Qingtao Meng<sup>a\*</sup>, Yue Wang<sup>a</sup>, Ming Yang<sup>a</sup>, Run Zhang<sup>b\*</sup>, Renjie Wang<sup>c</sup>, and Zhiqiang Zhang<sup>a</sup>

<sup>a</sup> School of Chemical Engineering, University of Science and Technology Liaoning, Anshan, 114044, China

E-mail: [qtmeng@ustl.edu.cn](mailto:qtmeng@ustl.edu.cn). Tel: +86-421-5928009

<sup>b</sup> Department of Chemistry and Biomolecular Sciences, Faculty of Science and Engineering, Macquarie University, Sydney NSW, 2109, Australia.

E-mail: [run.zhang@mq.edu.au](mailto:run.zhang@mq.edu.au). Tel: +61 (2) 9850 1175

<sup>c</sup> School of Chemistry and Molecular Biosciences, The University of Queensland, Brisbane, Queensland, Australia

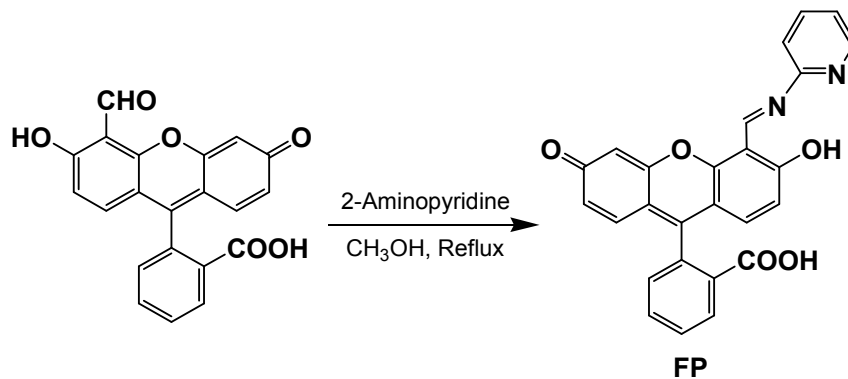

**Scheme S1.** Synthesis of the fluorescence chemosensor **FP**.

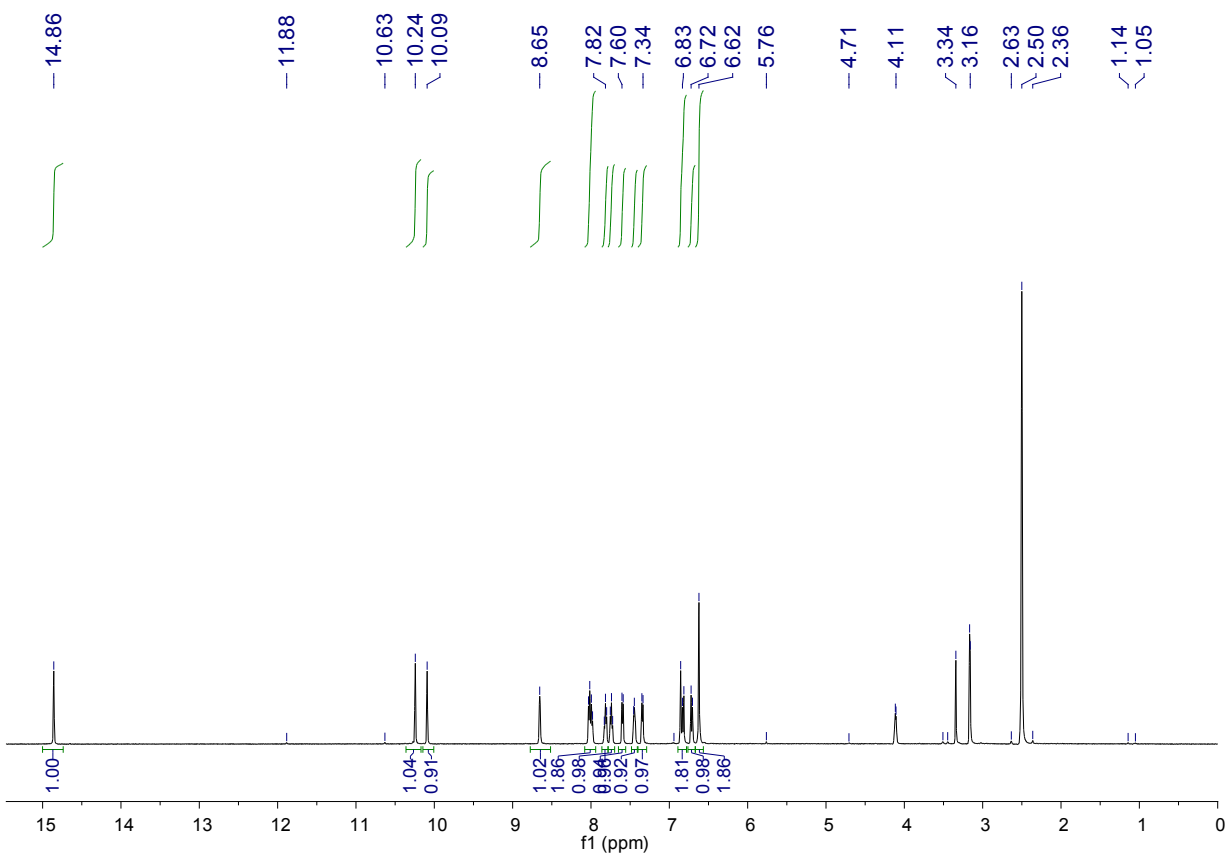

**Fig. S1.** <sup>1</sup>H-NMR of **FP** (DMSO-*d*<sub>6</sub>)

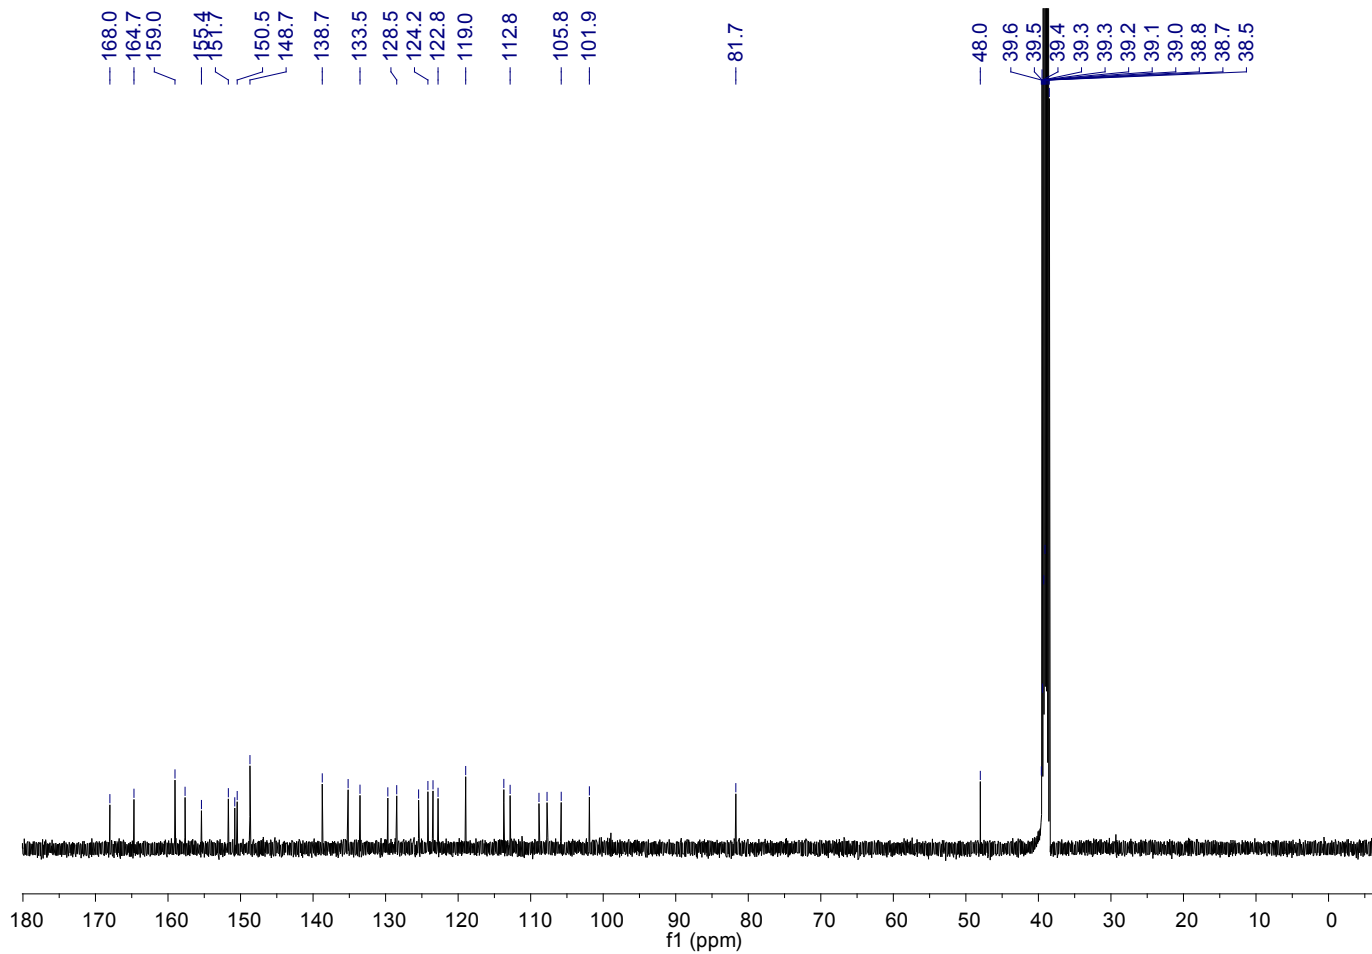

Fig. S2.  $^{13}\text{C}$ -NMR of FP (DMSO- $d_6$ )

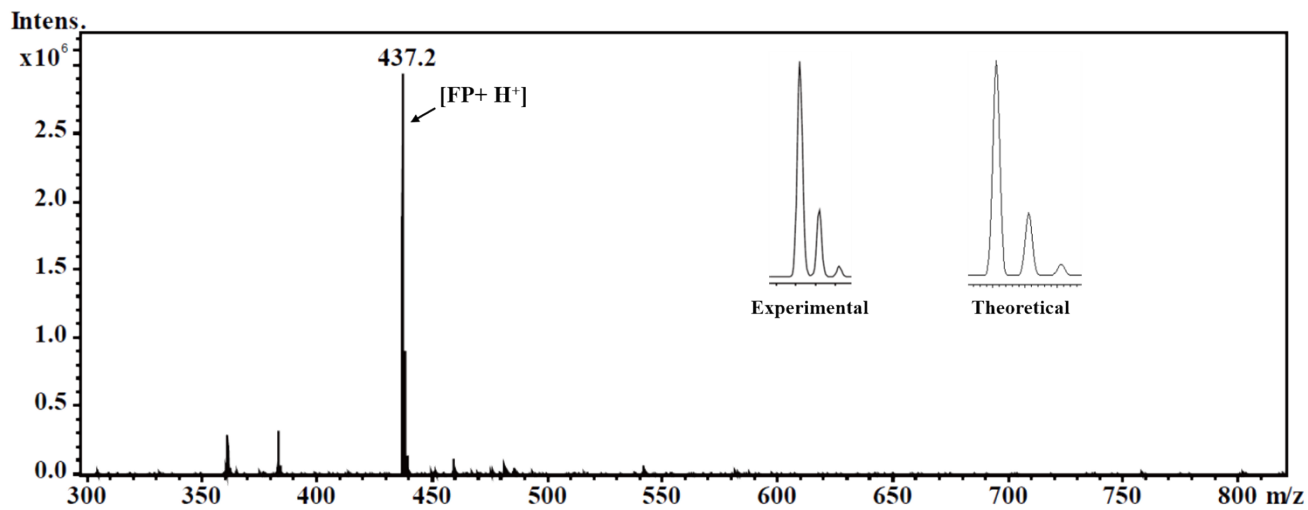

Fig. S3. ESI-mass spectra of FP

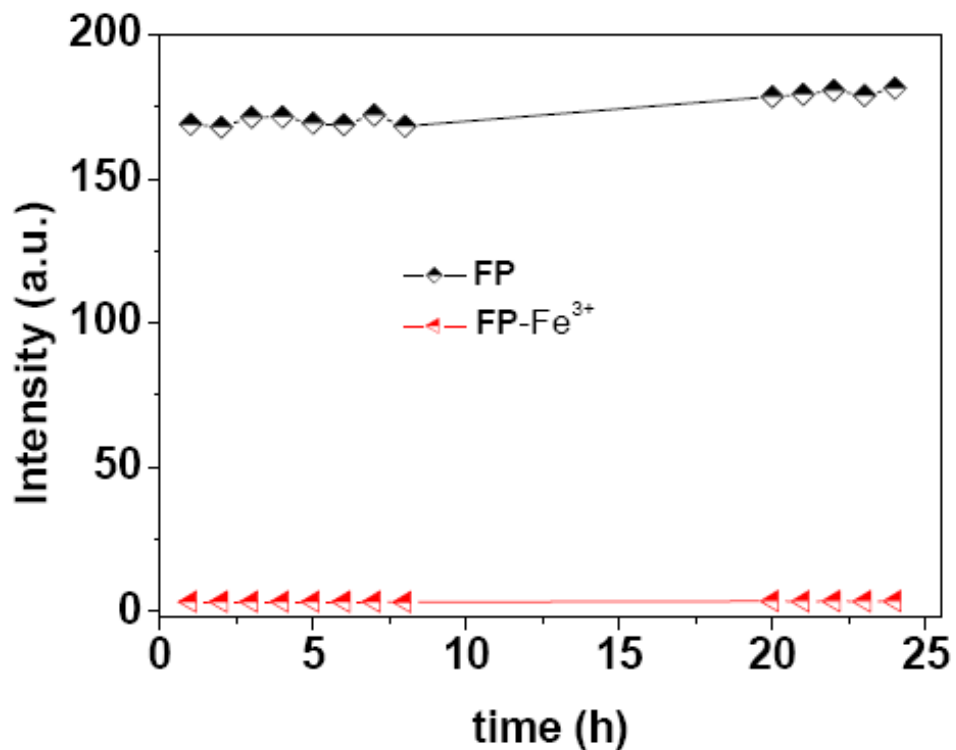

**Fig. S4.** Time-dependent fluorescence changes of **FP** and **FP-Fe<sup>3+</sup>** in HEPES aqueous buffer (THF: H<sub>2</sub>O = 3:7, 20 mM, pH = 7.4). Excitation at 430 nm.

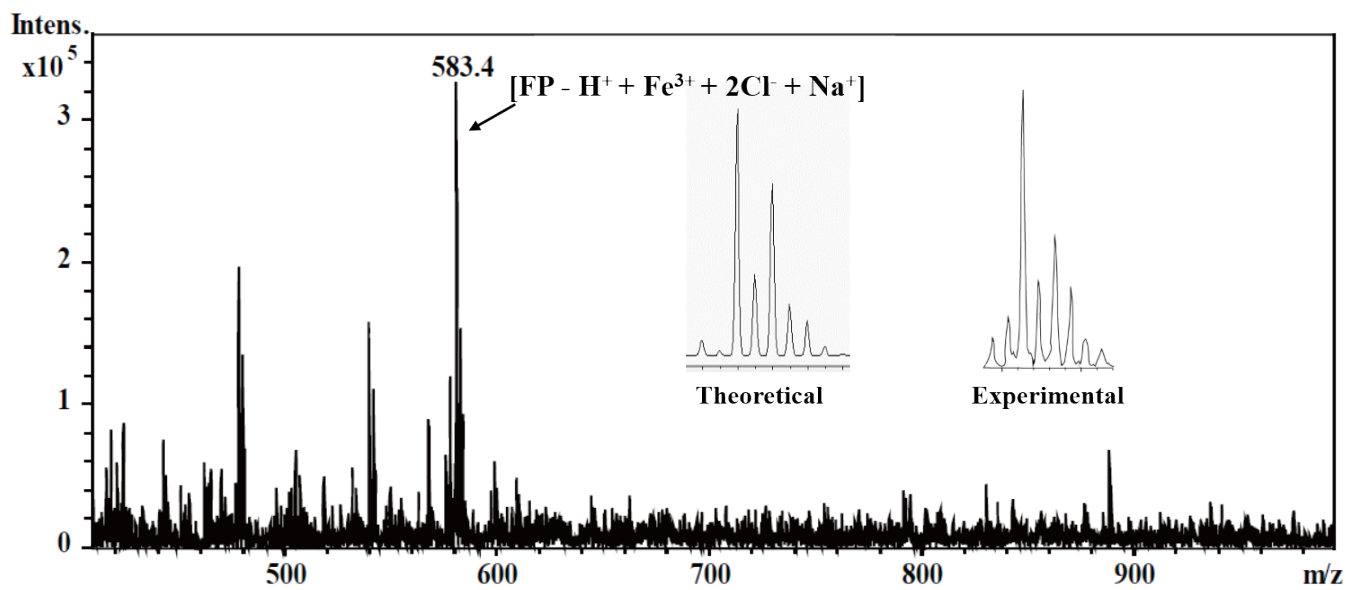

**Fig. S5.** ESI-mass spectra of **FP-Fe<sup>3+</sup>**

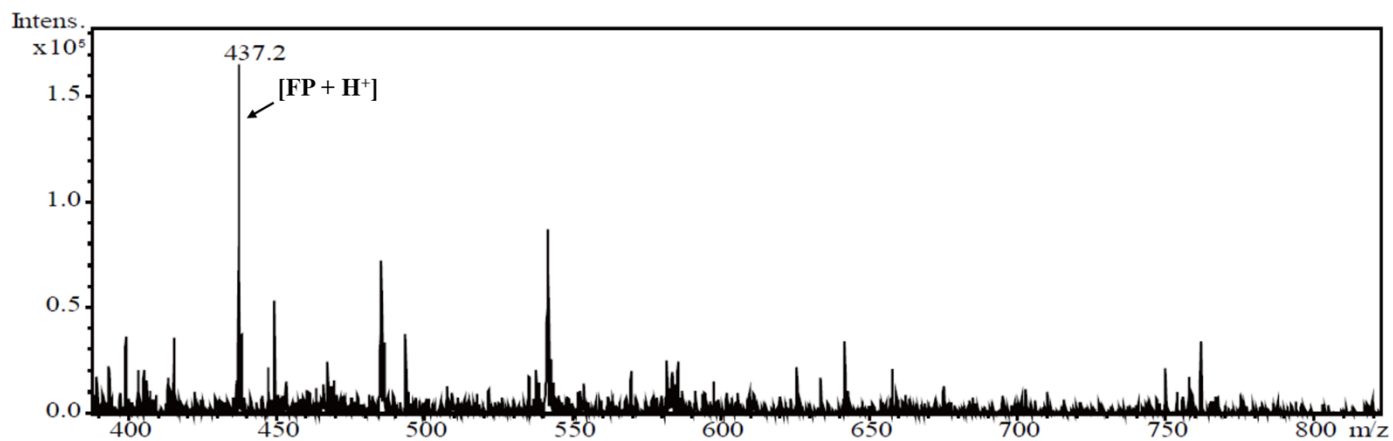

Fig. S6. ESI-mass spectra of FP-Fe<sup>3+</sup> in the presence of Pi

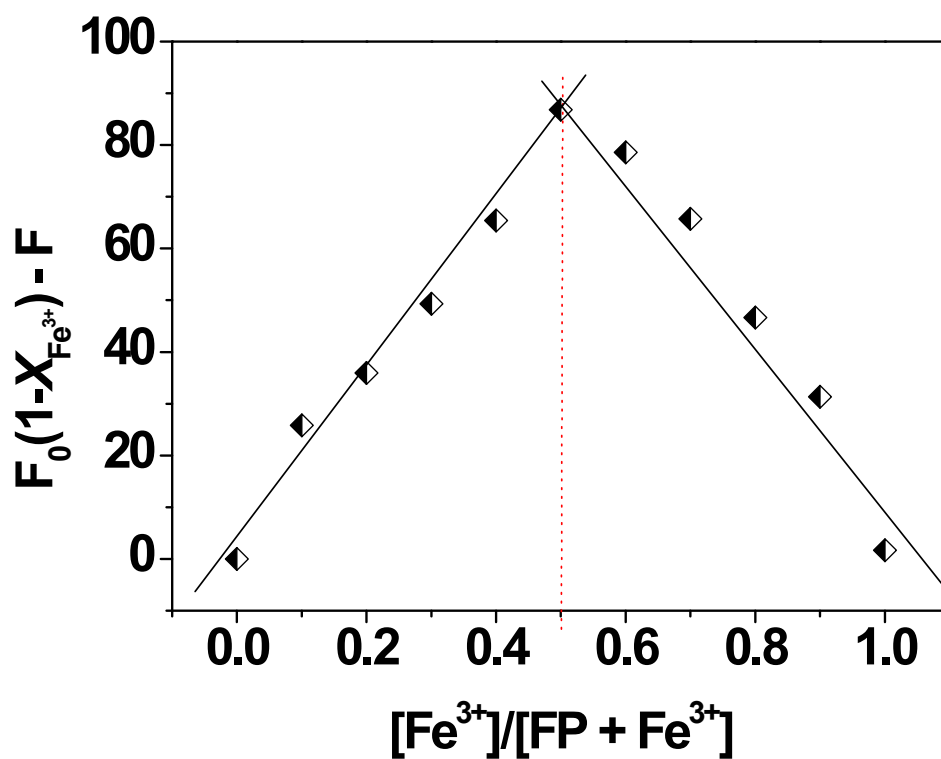

Fig. S7. Job's plot of FP toward Fe<sup>3+</sup> in HEPES aqueous buffer (THF: H<sub>2</sub>O = 3:7, 20 mM, pH = 7.4).

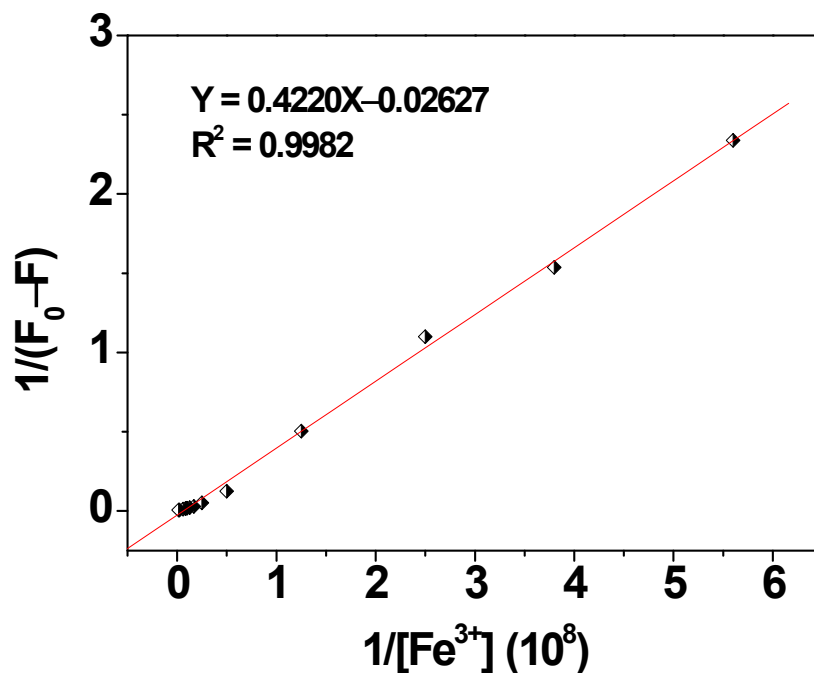

**Fig. S8.** Benesi-Hildebrand plot (emission at 515 nm) of FP (10  $\mu\text{M}$ ) based on 1:1 binding stoichiometry with  $\text{Fe}^{3+}$  in HEPES aqueous buffer (THF:  $\text{H}_2\text{O}$  = 3:7, 20 mM, pH = 7.4). Excitation at 430 nm.

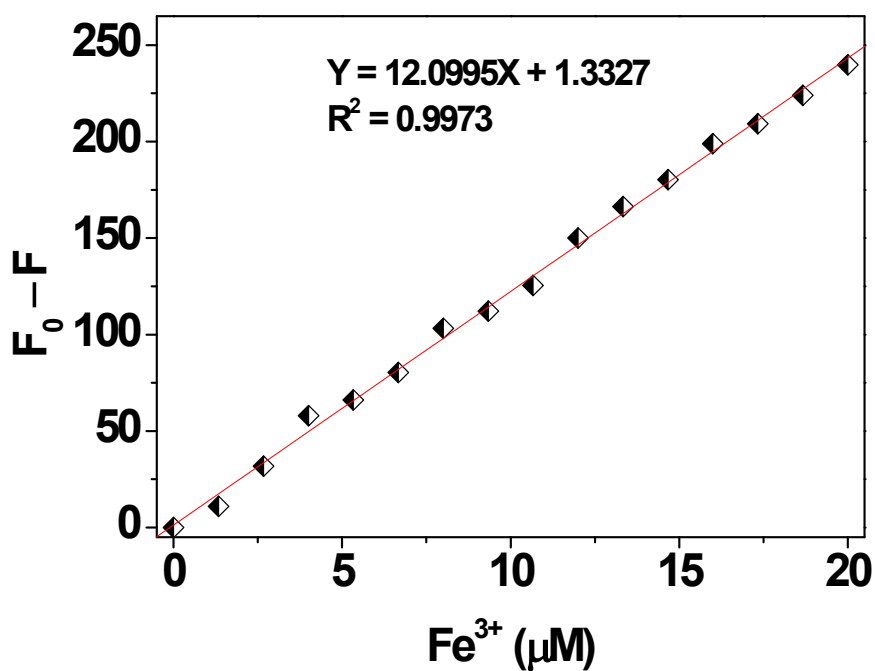

**Fig. S9.** The fluorescence intensity changes of FP (1  $\mu\text{M}$ ) versus low concentration  $\text{Fe}^{3+}$  (0–20  $\mu\text{M}$ ) at 515 nm in HEPES aqueous buffer (THF:  $\text{H}_2\text{O}$  = 3:7, 20 mM, pH = 7.4). Excitation was performed at 430 nm.

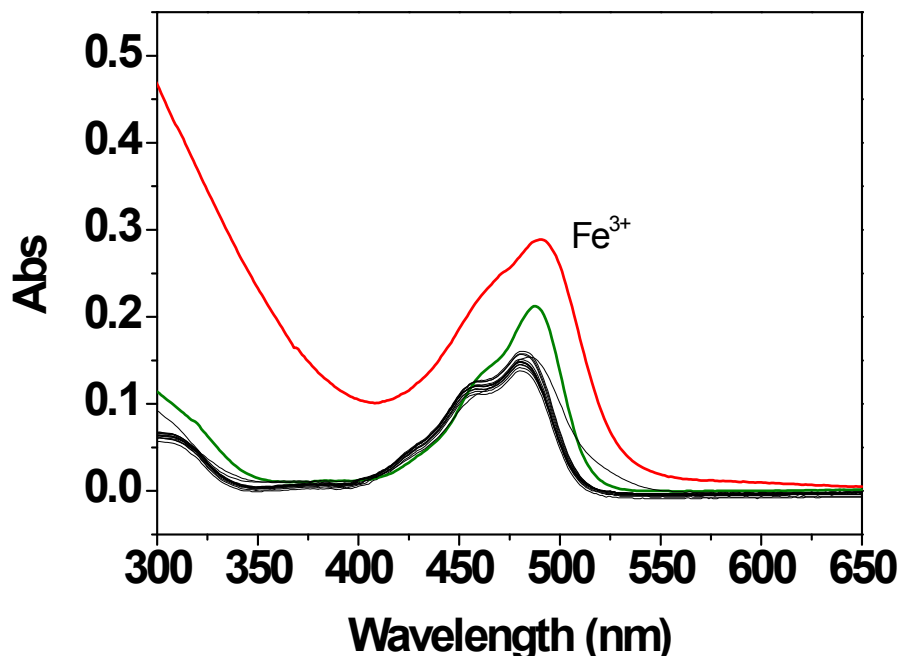

**Fig. S10.** Absorption spectra of FP (10  $\mu\text{M}$ ) in HEPES aqueous buffer (THF: H<sub>2</sub>O = 3:7, 20 mM, pH = 7.4) upon addition of various metal ions ( $3 \times 10^{-4}$  M).

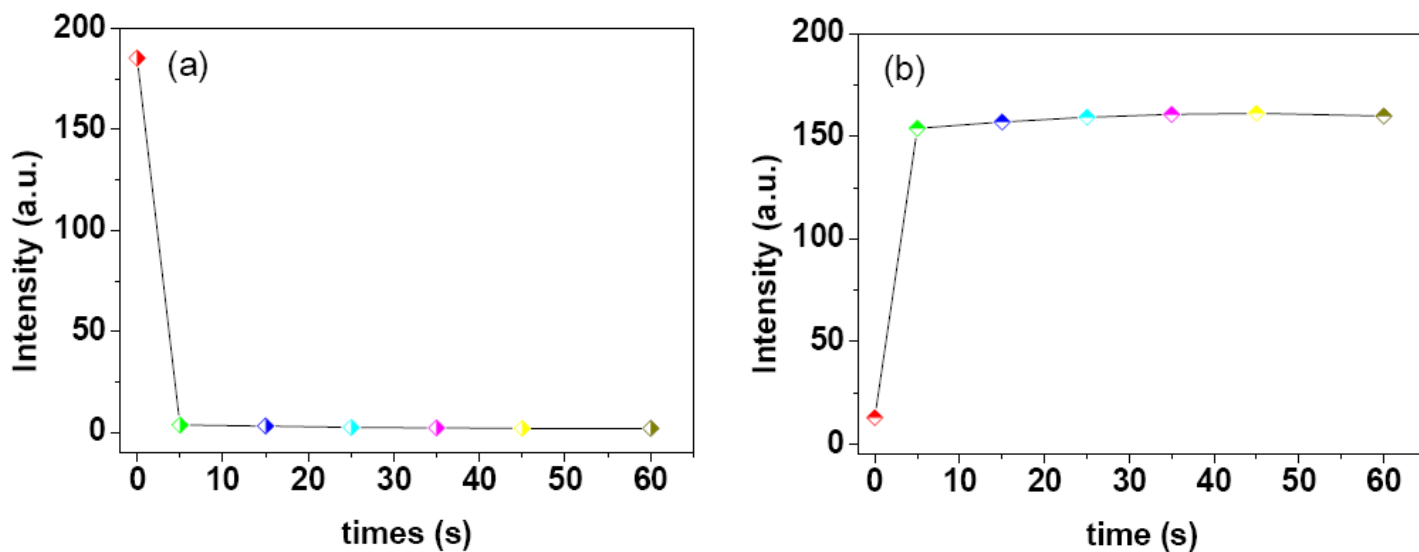

**Fig. S11.** The time courses fluorescence intensities at 515 nm of FP (10  $\mu\text{M}$ ) towards  $3 \times 10^{-4}$  M Fe<sup>3+</sup> (a) and FP-Fe<sup>3+</sup> (10  $\mu\text{M}$ ) in the presence of  $3 \times 10^{-4}$  M Pi (b) in HEPES aqueous buffer (THF: H<sub>2</sub>O = 3:7, 20 mM, pH = 7.4). Excitation was performed at 430 nm.

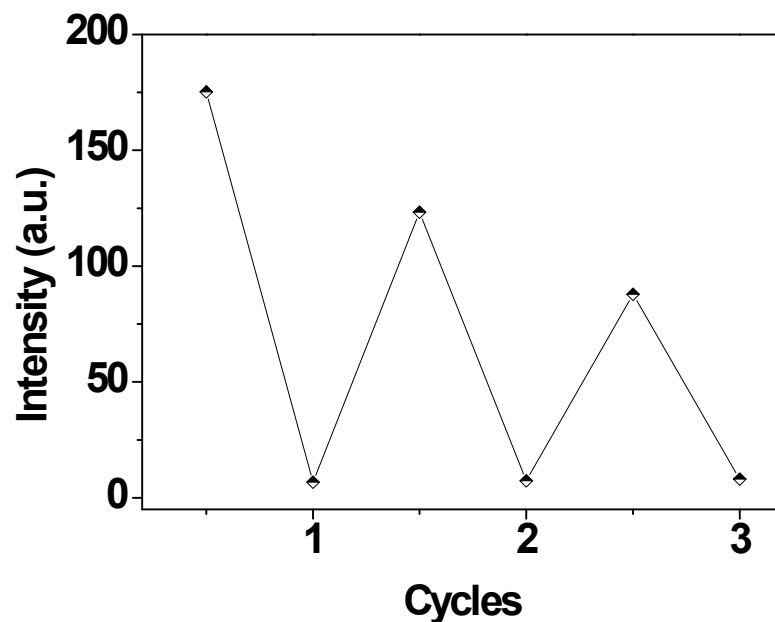

**Fig. S12.** Fluorescent emission intensity changes of FP (10  $\mu\text{M}$ ) at 515 nm in HEPES aqueous buffer (THF:  $\text{H}_2\text{O}$  = 3:7, 20 mM, pH = 7.4) upon the alternate addition of  $\text{Fe}^{3+}$ -Pi with several concentrations ratio (0 : 0, 10 : 0, 10 : 20, 20 : 10, 20 : 40, 40 : 20, respectively). Excitation at 430 nm.

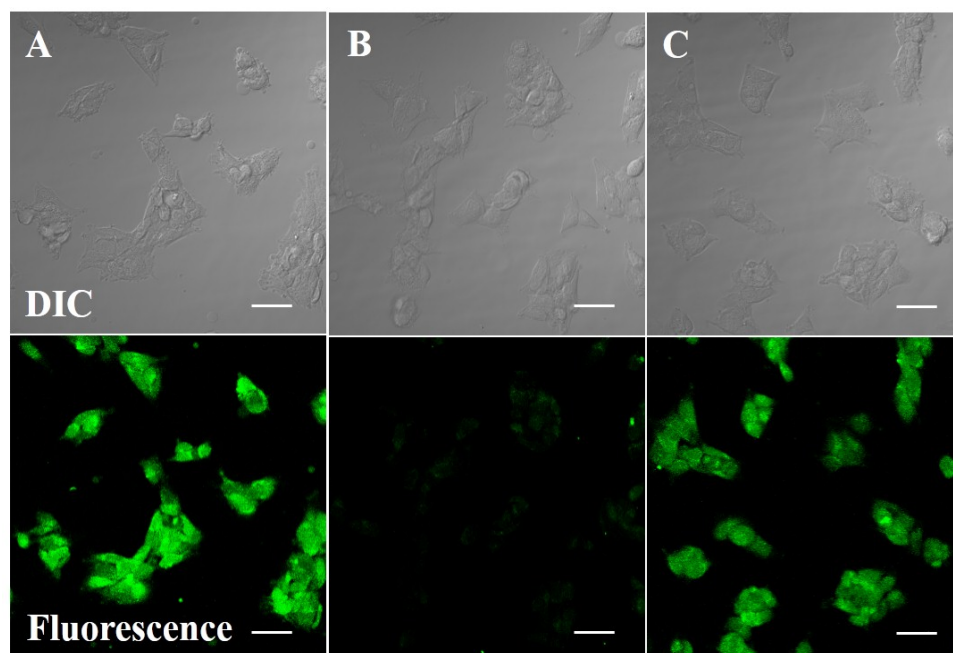

**Fig. S13.** Confocal bright-field (top), and fluorescence (bottom) imaging of  $\text{Fe}^{3+}$  and Pi in living U-343 MGa cells. (A) Cells stained with FP (1  $\mu\text{M}$ ) at 37  $^\circ\text{C}$  in a 5%  $\text{CO}_2$  incubator for 30 min, (B) and treated with  $\text{Fe}^{3+}$  (10  $\mu\text{M}$ ) for 20 min, (C) then the cells incubated with Pi (30  $\mu\text{M}$ ) for another 20 min. Scale bar = 40  $\mu\text{m}$ .



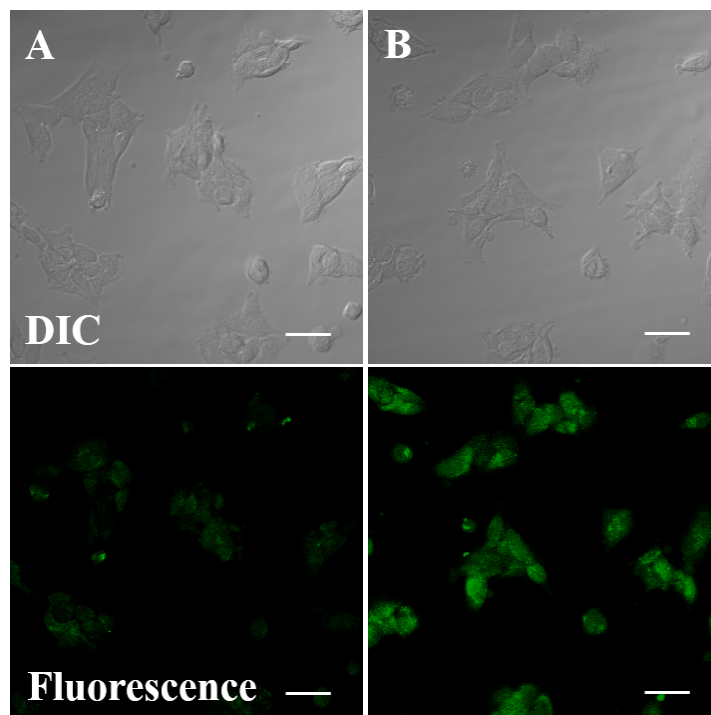

**Fig. S14.** Confocal bright-field (top), and fluorescence (bottom) imaging of Pi in living U-343 MGa cells. (A) Cells stained with **FP-Fe<sup>3+</sup>** (1  $\mu$ M) at 37 °C in a 5% CO<sub>2</sub> incubator for 30 min, (B) U-343 MGa cells treated with 100  $\mu$ M Pi and then incubated with **FP-Fe<sup>3+</sup>** (1  $\mu$ M) for 30 min. Scale bar = 40  $\mu$ m.
